# Two-Host, Two-Vector Basic Reproduction Ratio ( $R_0$ ) for Bluetongue

Joanne Turner<sup>1\*</sup>, Roger G. Bowers<sup>2</sup>, Matthew Baylis<sup>1</sup>

**1** Department of Epidemiology and Population Health, Institute of Infection and Global Health, University of Liverpool, Leahurst, Neston, United Kingdom, **2** Department of Mathematical Sciences, School of Physical Sciences, University of Liverpool, Liverpool, United Kingdom

## Abstract

Mathematical formulations for the basic reproduction ratio ( $R_0$ ) exist for several vector-borne diseases. Generally, these are based on models of one-host, one-vector systems or two-host, one-vector systems. For many vector borne diseases, however, two or more vector species often co-occur and, therefore, there is a need for more complex formulations. Here we derive a two-host, two-vector formulation for the  $R_0$  of bluetongue, a vector-borne infection of ruminants that can have serious economic consequences; since 1998 for example, it has led to the deaths of well over 1 million sheep in Europe alone. We illustrate our results by considering the situation in South Africa, where there are two major hosts (sheep, cattle) and two vector species with differing ecologies and competencies as vectors, for which good data exist. We investigate the effects on  $R_0$  of differences in vector abundance, vector competence and vector host preference between vector species. Our results indicate that  $R_0$  can be underestimated if we assume that there is only one vector transmitting the infection (when there are in fact two or more) and/or vector host preferences are overlooked (unless the preferred host is less beneficial or more abundant). The two-host, one-vector formula provides a good approximation when the level of cross-infection between vector species is very small. As this approaches the level of intraspecies infection, a combination of the two-host, one-vector  $R_0$  for each vector species becomes a better estimate. Otherwise, particularly when the level of cross-infection is high, the two-host, two-vector formula is required for accurate estimation of  $R_0$ . Our results are equally relevant to Europe, where at least two vector species, which co-occur in parts of the south, have been implicated in the recent epizootic of bluetongue.

**Citation:** Turner J, Bowers RG, Baylis M (2013) Two-Host, Two-Vector Basic Reproduction Ratio ( $R_0$ ) for Bluetongue. PLoS ONE 8(1): e53128. doi:10.1371/journal.pone.0053128

**Editor:** Jesus Gomez-Gardenes, Universidad de Zaragoza, Spain

**Received:** September 7, 2012; **Accepted:** November 26, 2012; **Published:** January 8, 2013

**Copyright:** © 2013 Turner et al. This is an open-access article distributed under the terms of the Creative Commons Attribution License, which permits unrestricted use, distribution, and reproduction in any medium, provided the original author and source are credited.

**Funding:** This work was funded by The Leverhulme Trust (<http://www.leverhulme.ac.uk>) through Research Leadership Award F/0025/AC "Predicting the effects of climate change on infectious diseases of animals", which was awarded to Matthew Baylis. The funder had no role in study design, data collection and analysis, decision to publish, or preparation of the manuscript.

**Competing Interests:** The authors have declared that no competing interests exist.

\* E-mail: [j.turner@liverpool.ac.uk](mailto:j.turner@liverpool.ac.uk)

## Introduction

Mathematical formulations for the basic reproduction ratio ( $R_0$ ) – defined as the average number of secondary infections produced by a typical primary infection in an otherwise totally susceptible population [1] – exist for several vector-borne diseases including those with one host and one vector, such as malaria [2] and those with two hosts and one vector, such as zoonotic trypanosomiasis [3], African horse sickness [4] and bluetongue [5,6]. To date, with the exception of Lopez et al. [7], almost no attention has been paid to developing mathematical formulations of  $R_0$  where there are both multiple hosts and multiple vectors. However, this is a common situation: for trypanosomiasis in Africa for example, two or more species of tsetse fly vector often co-exist; while for both African horse sickness and bluetongue in southern Africa, two competent vectors (*Culicoides imicola* and *C. bolitinos*) are frequently trapped together. Other diseases transmitted by multiple vectors include dengue [8], Japanese encephalitis [9] and malaria [10].

This situation may also apply to the recent European outbreak of bluetongue, which has caused the deaths of well over a million sheep. The outbreak began in 1998 in regions of southern Europe where the Afrotropical midge, *C. imicola*, occurs. Starting in 1999, it was also detected in Balkan countries where *C. imicola* was not

known, thereby implicating local *Culicoides* species, such as the *obsoletus* and *pulicaris* groups, as vectors. Since these co-occur with *C. imicola* over the latter's European range [11], it was reasonable to suspect that they may transmit the virus alongside *C. imicola* in some places; and epidemiological evidence for this was later provided in Sicily [12]. Subsequently, both BTV 1 and BTV 8 have been transmitted in regions with indigenous vectors, both with and without *C. imicola*. It is therefore quite likely that two or more vector species have co-transmitted BT virus in several parts of Europe in recent years.

Given the likely widespread existence of multivector, multihost disease systems, we derive and analyse  $R_0$  for the simplest of these: a two-host, two-vector system, using bluetongue as an example. We particularly wish to investigate the effect on  $R_0$  of measurable parameter values relating to vector abundance, vector competence and vector host preference. In order to do this we extend the work of Lopez et al. [7] by first including vector host preference and temperature-dependent transmission parameters and then studying the effect of specific parameters. We consider the effect of the following: (1) vector to host ratio, which is linked to vector abundance and varies with species and temperature, as evidenced by *C. imicola* and *C. bolitinos* in RSA [13,14]; (2) probability of transmission from host to vector, which is linked to vector

**Table 1.** Definitions and descriptions of the variables, parameters and rates that influence the dynamics of the two-host, two-vector system and the parameter values used to estimate  $R_0$ .

| Variable, Parameter or Rate | Construction                                                                                                                   | Definition or Description                                                                                                             | Point Estimate and/or Feasible Range                                                                                                                                                            | Comments and Formula if Temperature-dependent [vector species]                                                                                                                                                    |
|-----------------------------|--------------------------------------------------------------------------------------------------------------------------------|---------------------------------------------------------------------------------------------------------------------------------------|-------------------------------------------------------------------------------------------------------------------------------------------------------------------------------------------------|-------------------------------------------------------------------------------------------------------------------------------------------------------------------------------------------------------------------|
| $x^i$                       | $X^i/H_i$                                                                                                                      | proportion of host type $i$ that are susceptible                                                                                      |                                                                                                                                                                                                 | $i$ can be C (cattle) or S (sheep)                                                                                                                                                                                |
| $y^i$                       | $Y^i/H_i$                                                                                                                      | proportion of host type $i$ that are infectious                                                                                       |                                                                                                                                                                                                 |                                                                                                                                                                                                                   |
| $z^i$                       | $Z^i/H_i$                                                                                                                      | proportion of host type $i$ that have recovered                                                                                       |                                                                                                                                                                                                 |                                                                                                                                                                                                                   |
| $H_i$                       | $X^i+Y^i+Z^i$                                                                                                                  | total number of host type $i$                                                                                                         |                                                                                                                                                                                                 |                                                                                                                                                                                                                   |
| $\lambda_{Hi}$              | $\lambda_{Hi} = \sum_{j=\{1,2\}} b_j a_j \phi_{ij} m_{ij} I_j / N_j$                                                           | rate at which susceptible hosts of type $i$ become infectious through being bitten by infectious vectors                              |                                                                                                                                                                                                 | $j$ can be 1 ( <i>C. imicola</i> ) or 2 ( <i>C. bolitinos</i> )                                                                                                                                                   |
| $b_j$                       |                                                                                                                                | probability of transmission from vector type $j$ to a host given an effective contact                                                 | 0.8–1.0                                                                                                                                                                                         | [ <i>C. sonorensis</i> ]                                                                                                                                                                                          |
| $a_j$                       |                                                                                                                                | biting rate of vector type $j$                                                                                                        | 0–0.5                                                                                                                                                                                           | $a(T) = 0.0002T(T - 3.7)(41.9 - T)^{1/2.7}$<br>[ <i>C. sonorensis</i> ]                                                                                                                                           |
| $\phi_{ij}$                 | $\phi_{Cj} = \frac{H_{Cj}}{H_{Cj} + \sigma_j H_{Sj}} = \frac{m_{Sj}}{m_{Sj} + \sigma_j m_{Cj}}$<br>$\phi_{Sj} = 1 - \phi_{Cj}$ | proportion of vectors of type $j$ attracted to hosts of type $i$                                                                      |                                                                                                                                                                                                 | As Gubbins et al. [6], for clarity we replace $\phi_{Cj}$ and $\phi_{Sj}$ with $\phi_j$ and $1 - \phi_j$ respectively.                                                                                            |
| $\sigma_j$                  |                                                                                                                                | host preference of vector type $j$<br>$\sigma < 1$ indicates a preference for cattle<br>$\sigma > 1$ indicates a preference for sheep | 0–1                                                                                                                                                                                             | <i>C. imicola</i> feeds predominantly on cattle and sheep [16,17], but prefers cattle [23].<br><i>C. bolitinos</i> feeds on cattle and horses [16,17] and breeds in cattle dung [14].                             |
| $m_{ij}$                    | $N_j/H_i$                                                                                                                      | ratio of vectors of type $j$ to hosts of type $i$                                                                                     | Many areas:<br>$m_{C1} = m_{S1} = 500$<br>(0–5000)<br>$m_{C2} = m_{S2} = 50$<br>(0–500)<br>Colder high-lying areas:<br>$m_{C1} = m_{S1} = 50$<br>(0–100)<br>$m_{C2} = m_{S2} = 500$<br>(0–5000) | In general, <i>C. imicola</i> is approx. 10 times more abundant than <i>C. bolitinos</i> [15].<br>In colder, high-lying areas, <i>C. imicola</i> is approx. 10 times less abundant than <i>C. bolitinos</i> [14]. |
| $N_j$                       | $S_j+L_j+I_j$                                                                                                                  | total number of vectors of type $j$                                                                                                   |                                                                                                                                                                                                 |                                                                                                                                                                                                                   |
| $r_i$                       |                                                                                                                                | recovery rate of host type $i$                                                                                                        | $r_C = 1/20.6$<br>$r_S = 1/16.4$                                                                                                                                                                |                                                                                                                                                                                                                   |
| $d_i$                       |                                                                                                                                | pathogen-induced mortality rate of host type $i$                                                                                      | $d_C = 0$<br>$d_S = 0.001-0.01$                                                                                                                                                                 |                                                                                                                                                                                                                   |
| $S_j$                       |                                                                                                                                | number of vectors of type $j$ that are susceptible                                                                                    |                                                                                                                                                                                                 |                                                                                                                                                                                                                   |
| $L_j$                       |                                                                                                                                | number of vectors of type $j$ that are latent                                                                                         |                                                                                                                                                                                                 |                                                                                                                                                                                                                   |
| $I_j$                       |                                                                                                                                | number of vectors of type $j$ that are infectious                                                                                     |                                                                                                                                                                                                 |                                                                                                                                                                                                                   |
| $\lambda_{Vj}$              | $\lambda_{Vj} = \sum_{i=\{C,S\}} \beta_j a_j \phi_{ij} y^i$                                                                    | rate at which susceptible vectors of type $j$ become latent through biting infectious hosts                                           |                                                                                                                                                                                                 |                                                                                                                                                                                                                   |
| $\beta_j$                   |                                                                                                                                | probability of transmission from a host to vector type $j$ given an effective contact                                                 | $\beta_1 = 0.0021-0.0654$<br>$\beta_2 = 0.0268-0.6444$                                                                                                                                          | $\beta_1(T) = 0.0003699 \exp(0.1725T)$<br>[ <i>C. imicola</i> ]<br>$\beta_2(T) = 0.005465 \exp(0.159T)$<br>[ <i>C. bolitinos</i> ]<br>Both from data in [15].                                                     |
| $\nu_j$                     |                                                                                                                                | rate at which latent vectors of type $j$ become infectious (= 1/EIP, where EIP = extrinsic incubation period)                         | 1/4–1/26                                                                                                                                                                                        | $\nu(T) = 0.0003T(T - 10.4)$<br>[ <i>C. sonorensis</i> ]                                                                                                                                                          |
| $\mu_j$                     |                                                                                                                                | natural mortality rate of vector type $j$                                                                                             | 0.1–0.5                                                                                                                                                                                         | $\mu(T) = 0.009 \exp(0.16T)$<br>[ <i>C. sonorensis</i> ]                                                                                                                                                          |
| $\rho_j$                    |                                                                                                                                | replacement rate of vector type $j$                                                                                                   |                                                                                                                                                                                                 |                                                                                                                                                                                                                   |

Unless otherwise stated, values were taken from Gubbins et al. [6]. Subscripts 1 and 2 denote *C. imicola* and *C. bolitinos* respectively.  
doi:10.1371/journal.pone.0053128.t001

competence and also varies with species and temperature [15]; (3) vector host preference, which differs between species [14,16,17]. Importantly, we also work directly with  $R_0$ , rather than the threshold  $T$  proposed by Lopez et al. [7], which is not valid in all

regions of feasible parameter space. The notation we use allows us to make direct comparisons with a previously published two-host, one-vector formula for bluetongue. We illustrate our results by parameterising the model for a specific disease system, namely

bluetongue in South Africa. We use the situation in South Africa because of the availability of extensive distribution data, together with detailed experimental results on the relative vector competencies of the two main vector species [15]. Similar data for different European bluetongue vectors do not exist. It is known that several European vector species transmit bluetongue virus and that there are differences in host preference between these species. For example, Garros et al. [18] show that *C. chiopterus* prefers to feed on cattle while *C. obsoletus* is more of a generalist. However, nothing is known of their respective vector competencies. This highlights the need for a two-host, two-vector formula for  $R_0$  as well as experimental work to establish the vector competence of each species. Although we have focussed on the situation in South Africa, the framework and general results presented here are equally relevant to Europe.

## Analysis

### Model Equations

Equations describing the dynamics of a two-host, two-vector system are given below, whilst the variables and parameters of the model are defined and described in Table 1. For clarity, we have adopted a similar notation to that used by Gubbins et al. [6]. In short, hosts can be either susceptible, infectious or recovered (and in this case immune), whilst vectors can be either susceptible, latent or infectious. The proportions of susceptible, infectious and recovered hosts are denoted by  $x^i$ ,  $y^i$  and  $z^i$  respectively, whilst the numbers of susceptible, latent and infectious vectors are denoted by  $S_j$ ,  $L_j$  and  $I_j$  respectively ( $N_j$  in total). Susceptible hosts of type  $i$  [where  $i$  can be either  $C$  (cattle) or  $S$  (sheep)] become infectious at rate  $\lambda_{Hi}$ , which is the sum over vector types indicated by  $j$  [where  $j$  can be either 1 (*C. imicola*) or 2 (*C. bolitinos*)] of  $b_j a_j (\phi_{ij} m_{ij} I_j / N_j)$ . The third term is composed of  $m_{ij}$  the ratio of vectors of type  $j$  to hosts of type  $i$ ,  $I_j / N_j$  the proportion of vectors of type  $j$  that are infectious and  $\phi_{ij}$  the proportion of vectors of type  $j$  attracted to hosts of type  $i$  (i.e. reflecting the preference of vector type  $j$  for host type  $i$ ). So, the third term gives the average number of infectious vectors of type  $j$  attracted to a host of type  $i$  (after taking into account vector type  $j$ 's preference for host type  $i$ ). This is multiplied by  $a_j$ , the (temperature-dependent) biting rate of vectors of type  $j$ , and  $b_j$ , the probability of transmission from a vector of type  $j$  to a host given an effective contact. Similarly, susceptible vectors of type  $j$  become latent at rate  $\lambda_{Vj}$ , which is the sum over host types (indicated by  $i$ ) of  $\beta_j a_j (\phi_{ij} y^i)$ . The third term is the probability of a vector of type  $j$  being attracted to an infectious host of type  $i$ . This is multiplied by  $a_j$ , the (temperature-dependent) biting rate of vectors of type  $j$ , and  $\beta_j$ , the probability of transmission from a host to a vector of type  $j$  given an effective contact. An infectious host remains infectious until it either recovers (at rate  $r_i$ ) or dies (at rate  $d_i$ ). After a short extrinsic incubation period (on average  $1/v_j$ ), latent vectors become infectious. They remain infectious until they die, which occurs at rate  $\mu_j$ . Susceptible vectors are added to the system at rate  $\rho_j$ . The model assumes that there is no seasonal aspect to vector recruitment or population size and that there is no latent period in hosts, recovered animals are immune and the host population remains constant except for losses due to disease-induced mortality.

### Hosts.

$$\frac{dx^i}{dt} = -\lambda_{Hi} x^i$$

$$\frac{dy^i}{dt} = \lambda_{Hi} x^i - (r_i + d_i) y^i$$

$$\frac{dz^i}{dt} = r_i y^i$$

where  $i \in \{C, S\}$ .

### Vectors.

$$\frac{dS_j}{dt} = \rho_j N_j - \lambda_{Vj} S_j - \mu_j S_j$$

$$\frac{dL_j}{dt} = \lambda_{Vj} S_j - (v_j + \mu_j) L_j$$

$$\frac{dI_j}{dt} = v_j L_j - \mu_j I_j$$

where  $j \in \{1, 2\}$ .

### Basic Reproduction Ratio

The ability of the pathogen to spread can be expressed in terms of the basic reproduction ratio  $R_0$ . Mathematically,  $R_0$  is the dominant eigenvalue of the next-generation matrix  $K$ . For vector-borne transmission models like the one described above,

$$K = \begin{pmatrix} 0 & A \\ B & 0 \end{pmatrix}$$

where matrix  $A$  describes vector to host transmission and matrix  $B$  describes host to vector transmission (see Appendix 1 in File S1). We could work directly with the characteristic equation  $|K - \lambda I| = 0$ . However, there are significant advantages in using a result shown in Appendix 2 in File S1, namely that  $R_0$  is the square root of the dominant eigenvalue of  $BA$  (a  $4 \times 4$  submatrix of  $K^2$ ). Not only is  $BA$  smaller than  $K$  but also its elements have an obvious biological interpretation in terms of  $R_{ij}$ , the average number of infectious vectors of type  $i$  produced by one infectious vector of type  $j$  (necessarily in two generations). It is such biological interpretation that we seek. The utility of working with  $BA$  is doubtless associated with the argument that, in contrast to directly-transmitted infections, for vector-borne infections  $R_0^2$  makes more sense biologically [2] and is in fact what is measured in the field (i.e. two-generation 'like' to 'like' transmission).

Following the above procedure we find that

$$R_0 = \sqrt{\frac{1}{2} [(R_{11} + R_{22}) + \sqrt{(R_{11} + R_{22})^2 - 4(R_{11}R_{22} - R_{12}R_{21})}]}, \quad (1)$$

where specifically

$$R_{11} = \left( \frac{b_1 \beta_1 a_1^2}{\mu_1} \right) \left( \frac{v_1}{v_1 + \mu_1} \right) \left( \frac{\phi_1^2 m_{C1}}{r_C + d_C} + \frac{(1 - \phi_1)^2 m_{S1}}{r_S + d_S} \right) \quad (2)$$

$$R_{22} = \left( \frac{b_2 \beta_2 a_2^2}{\mu_2} \right) \left( \frac{v_2}{v_2 + \mu_2} \right) \left( \frac{\phi_2^2 m_{C2}}{r_C + d_C} + \frac{(1 - \phi_2)^2 m_{S2}}{r_S + d_S} \right)$$

$$R_{12} = \left( \frac{b_2 \beta_1 a_2 a_1}{\mu_2} \right) \left( \frac{v_2}{v_2 + \mu_2} \right) \left( \frac{\phi_2 \phi_1 m_{C1}}{r_C + d_C} + \frac{(1 - \phi_2)(1 - \phi_1) m_{S1}}{r_S + d_S} \right)$$

$$R_{21} = \left( \frac{b_1 \beta_2 a_1 a_2}{\mu_1} \right) \left( \frac{v_1}{v_1 + \mu_1} \right) \left( \frac{\phi_1 \phi_2 m_{C2}}{r_C + d_C} + \frac{(1 - \phi_1)(1 - \phi_2) m_{S2}}{r_S + d_S} \right)$$

Note that the proportion of vectors of type  $j$  attracted to hosts of type  $i$

$$\phi_{ij} = \frac{\omega_{ij} H_i}{\sum_k \omega_{kj} H_k},$$

where  $\omega_{ij}$  is a measure of vector type  $j$ 's preference for host type  $i$  and  $H_i$  is the total number of hosts of type  $i$ . For two host species (cattle  $C$  and sheep  $S$ ), this can be rewritten as

$$\phi_{Cj} = \frac{H_C}{H_C + \sigma_j H_S} \text{ and } \phi_{Sj} = 1 - \phi_{Cj},$$

where vector host preference is now denoted by  $\sigma_j$ . In terms of vector to host ratios, where  $m_{Cj} = N_j / H_C$  and  $m_{Sj} = N_j / H_S$ , the first of these is

$$\phi_{Cj} = \frac{m_{Sj}}{m_{Sj} + \sigma_j m_{Cj}}. \quad (3)$$

As Gubbins et al. [6], for clarity we replace  $\phi_{Cj}$  and  $\phi_{Sj}$  with  $\phi_j$  and  $1 - \phi_j$  respectively.

From Gubbins et al. [6], we know that  $R_0 = \sqrt{R_{11}}$  and  $R_0 = \sqrt{R_{22}}$  for two-host, one-vector systems involving vector type 1 and vector type 2, respectively. For the two-host, two-vector system we find from equations (2) that when  $\phi_1 = \phi_2$ ,  $R_{11} R_{22} - R_{12} R_{21} = 0$  and hence  $R_0 = \sqrt{R_{11} + R_{22}}$ . If vectors 1 and 2 are identical in terms of parameter values (i.e. all parameter values for vector species 1 equal those for vector species 2) and equal in number, then  $R_{11} = R_{22} = R_{12} = R_{21}$  and so  $R_0 = \sqrt{2} R_{11}$ . In other words, the two-host, two-vector  $R_0$  is greater than the two-host, one-vector  $R_0$  by a factor of  $\sqrt{2}$ . So, in this case, if it were assumed that there was only one vector species transmitting the infection, the basic reproduction ratio would be underestimated (because the average number of relevant vectors per host would be underestimated). When the vectors are not identical, as the level of cross-infection  $R_{12} R_{21}$  increases,  $R_0$  increases from  $\sqrt{R_{11}}$  (when  $R_{12} R_{21} = 0$  and  $R_{11} > R_{22}$ ), through  $\sqrt{R_{11} + R_{22}}$  (when  $R_{11} R_{22} - R_{12} R_{21} = 0$ ) to  $\sqrt[4]{R_{12} R_{21}}$  (when  $R_{12} R_{21}$  is very large).

## Results

For the two-host, one-vector system, Gubbins et al. [6] found that the parameters with a significant effect on  $R_0$  were temperature ( $T$ ) [via biting rate, extrinsic incubation period (EIP), vector mortality rate], the probability of transmission from host to vector ( $\beta$ ) [which was not temperature-dependent in Gubbins et al. [6]] and the ratios of vectors to hosts ( $m_C$  and  $m_S$ ).

For the two-host, two-vector system, we propose to focus on the effects on  $R_0$  of varying the ratios of vectors to hosts ( $m_{C1}$ ,  $m_{C2}$ ,  $m_{S1}$ ,  $m_{S2}$ ) [linked to vector abundance], the probabilities of transmission from host to vector ( $\beta_1$ ,  $\beta_2$ ) [linked to vector competence and temperature-dependent in our model] and the vector host preferences ( $\sigma_1$ ,  $\sigma_2$ ). Our aim is to provide a general framework for two-host, two-vector approaches to bluetongue; however there is a paucity of data. There is one situation, South Africa, where *C. imicola* and *C. bolitinos* coexist across most of the country and for which we do have data. We undertake the analysis with reference to this.

As shown by Meiswinkel et al. [13], there are many areas (e.g. Western Cape, western part of the Eastern Cape, Mpumalanga, Gauteng and Limpopo Province) where *C. imicola* is 10 to 100 times more abundant than *C. bolitinos*. However, there are areas, in particular in the cooler high-lying areas of the Free State, where *C. bolitinos* is approximately 10 times more abundant than *C. imicola* [14] and Venter et al. [19] suggest that *C. bolitinos* may play an important role in the transmission of BTV in these areas. Paweska et al. [15] demonstrate that, regardless of incubation temperature (10, 15, 18, 23.5 or 30°C), the mean virus titre/midge, infection rate and proportion of infected females with transmission potential (i.e. virus titre/midge  $\geq 10^3$  TCID<sub>50</sub>, where TCID<sub>50</sub> (tissue culture infectious dose 50) is the amount of virus that will infect 50% of midges inoculated with it) are significantly higher in *C. bolitinos* than in *C. imicola* and suggest that, because of its significantly higher vector competence, *C. bolitinos* could be the primary vector in areas where it occurs in lower numbers than *C. imicola*, as well as in these cooler regions. Here, abundance is expressed through the ratios of vectors to hosts ( $m_{C1}$ ,  $m_{C2}$ ,  $m_{S1}$ ,  $m_{S2}$ ), while vector competence is expressed through the probabilities of transmission from host to vector ( $\beta_1$ ,  $\beta_2$ ). Regarding vector host preferences, there is evidence [14,16] that many *Culicoides* species prefer to feed on cattle and some suggestion that *C. bolitinos* may not feed on sheep at all [16,17].

## Estimating $\beta_1$ and $\beta_2$

Fu et al. [20] show that only midges containing  $\geq 10^3$  TCID<sub>50</sub> release detectable amounts of virus in their saliva. So, first we define 'infectious' as 'having a virus titre  $\geq 10^3$  TCID<sub>50</sub>'. Next we obtain from Table 2 of Paweska et al. [15], for several different temperatures, the proportion of vectors remaining that are infectious [i.e. (number of infectious vectors)/(number of initially susceptible vectors known to have fed on infected blood and still be alive after the incubation period)]. Each of these data points is equal to  $\beta_j$  at a given temperature. By fitting curves to the data, we can find temperature-dependent functions for  $\beta_1$  (*C. imicola*) and  $\beta_2$  (*C. bolitinos*). Exponential curves of the form  $\beta_j = p_j \exp(q_j T)$  were fitted using a nonlinear least-squares method with bisquare weighting of the residuals. The coefficients and goodness of fit statistics are given in Table 2. The curves (shown in Appendix 3 in File S1) adequately describe the relationships between  $\beta_1$ ,  $\beta_2$  and temperature over this range of temperatures. Note that as temperature varies from 10 to 30°C, the ratio  $\beta_2/\beta_1$  varies from 9.85 to 12.91 (i.e. the probability of transmission of *C. bolitinos* is always about 10 times greater than that of *C. imicola*).

## Other parameter estimates

The estimates for  $m_{C1}$ ,  $m_{C2}$ ,  $m_{S1}$  and  $m_{S2}$  were based on catch sizes and species composition reported in Venter & Meiswinkel [14] and Venter et al. [17]. They are rough estimates designed to reflect the relative orders of magnitude of each vector species. As in Guis et al. [21], we assume that catch size approximates ratio of vectors to hosts. Estimates for the remaining parameters were

**Table 2.** Coefficients and goodness of fit statistics for exponential curves of the form  $\beta_j = p_j \exp(q_j T)$ , where  $j$  can be 1 (*C. imicola*) or 2 (*C. bolitinos*), fitted to data extracted from Paweska et al. [15].

|                                                  | <i>C. imicola</i>                   | <i>C. bolitinos</i>            |
|--------------------------------------------------|-------------------------------------|--------------------------------|
| <b>Coefficients (with 95% confidence bounds)</b> |                                     |                                |
| $p$                                              | 0.0003699<br>(-0.0002815, 0.001021) | 0.005465<br>(-0.0162, 0.02713) |
| $q$                                              | 0.1725<br>(0.1111, 0.2339)          | 0.159<br>(0.01987, 0.2982)     |
| <b>Goodness of fit</b>                           |                                     |                                |
| sse                                              | 8.5345e-005                         | 0.0519                         |
| adjrsquare                                       | 0.9648                              | 0.8578                         |
| rmse                                             | 0.0046                              | 0.1139                         |

doi:10.1371/journal.pone.0053128.t002

taken from Gubbins et al. [6]. Details are given in Table 1. Six of these estimates  $a_j$ ,  $v_j$  and  $\mu_j$  (i.e. three for each vector species) depend on temperature. They are positive and increase monotonically for temperatures between 10.4°C and 35.5°C.

### Effect of differences in $m_{ij}$ and $\beta_j$

In order to focus on the effects on  $R_0$  of differences in vector competence, vector abundance and vector host preference, the two species of vectors are assumed to be the same in every way except  $\beta_j$ ,  $m_{ij}$  and  $\sigma_j$ . We first consider the effect of differences in  $m_{ij}$  for fixed  $\beta_j$  and  $\sigma_j$ .

First note that, as shown in equation (3),  $\phi_{Cj}$  varies with  $m_{Cj}$ ,  $m_{Sj}$  and  $\sigma_j$ . However, when  $m_{Cj}$  equals  $m_{Sj}$ ,  $\phi_{Cj}$  (and hence  $\phi_j$ ) depends on  $\sigma_j$  alone. In Figure 1 (and Figure 2 below),  $m_{S1}$  and  $m_{S2}$  equal  $m_{C1}$  and  $m_{C2}$  respectively and  $\sigma_1 = \sigma_2 = 0.5$ . Consequently  $\phi_1$  and  $\phi_2$  are fixed at 0.67. The transmission probabilities  $\beta_1$  and  $\beta_2$  are determined (as described in Table 1) by temperature, which is 25°C in Figure 1A and 15°C in Figure 1B. The parameters  $m_{C1}$  and  $m_{C2}$  vary independently along the  $x$  and  $y$  axes respectively. In Figure 1A, we can clearly see that  $R_0$  is greater when vector 2 (*C. bolitinos*) is more abundant than vector 1 (*C. imicola*) [i.e. when  $m_{C2}$  is greater than  $m_{C1}$ ] than when the reverse is true. For example, when  $m_{C1} = 50$  and  $m_{C2} = 500$  (i.e. in the top left-hand corner),  $R_0$  is 7.0, whereas, when  $m_{C1} = 500$  and  $m_{C2} = 50$  (i.e. in the bottom right-hand corner),  $R_0$  is only 3.1. This large difference is due to the fact that  $\beta_2$  is approximately 10 times greater than  $\beta_1$  and illustrates the balance between vector abundance and vector competence for *C. imicola* and *C. bolitinos*. The same relationship is observed when the temperature is 15°C (i.e. in Figure 1B), but  $R_0$  is much smaller at this temperature.

It is also clear from Figure 1 that omitting one vector species (i.e. being constrained to one axis) leads to underestimation of  $R_0$  and when that species has a significantly higher vector competence (as does vector species 2) the degree of underestimation can be dramatic.

In Figure 2,  $\beta_1$  and  $\beta_2$  vary with temperature, as described in Table 1. The vector to host ratios  $m_{S1}$  and  $m_{S2}$  equal  $m_{C1}$  and  $m_{C2}$  respectively, which vary simultaneously with  $x$  as described below:

$$\left. \begin{aligned} m_{C1} &= 500 - 450x \\ m_{C2} &= 50 + 450x \end{aligned} \right\} \quad \text{for } 0 \leq x \leq 1.$$

Relative abundance ( $m_{C1}/m_{C2} = N_1/N_2$ ) is therefore described by

the hyperbola

$$\frac{m_{C1}}{m_{C2}} = \frac{500}{50 + 450x} - 1.$$

Figure 2A shows how  $R_0$  varies with relative abundance. Curves 1 (green) and 2 (blue) show the relationship when temperature is fixed at 15°C and 25°C, respectively. Curve 3 (red) is produced when temperature ( $T = 25 - 10x$  for  $0 \leq x \leq 1$ ) and relative abundance vary simultaneously with  $x$ . Hence, curve 3 (red) shows the relationship when temperature varies from 15°C to 25°C as relative abundance varies from 0.1 (when *C. bolitinos* is 10 times more abundant than *C. imicola*) to 10 (when *C. imicola* is 10 times more abundant than *C. bolitinos*). By definition, curve 3 is constrained to start at the same point as curve 1 and end at the same point as curve 2. Curve 3 can be thought of as a path across the landscape, moving from the cooler high-lying regions where *C. bolitinos* dominates to the warmer low-lying regions where *C. imicola* dominates. Along this path, temperature (and hence  $\beta_j$ ) and relative abundance vary simultaneously.

Figure 2B shows how  $R_0$  varies with relative abundance ( $y$  axis) and temperature ( $x$  axis) separately. It clearly shows that, for a fixed temperature,  $R_0$  always decreases as relative abundance of *C. imicola* increases. It also shows that, for fixed relative abundance,  $R_0$  initially increases with temperature, but starts to decrease again beyond 31°C. Curve 3 in Figure 2A corresponds to moving from A to B across the surface in Figure 2B. Along this path, the highest  $R_0$  corresponds to a relative abundance of approximately 1.4 and a temperature of approximately 21.1°C. In this case, for temperatures greater than 21.1°C,  $R_0$  drops with rising temperature because, at the same time, the less competent vector is replacing the more competent one.

In summary, we find that high vector competence can compensate for low vector abundance and that temperature, which determines the transmission probabilities  $\beta_1$  and  $\beta_2$  and also influences the abundance and composition of vector species, has a marked effect on  $R_0$ .

### Effect of differences in $\sigma_j$

We now consider the important effect that vector host preference ( $\sigma_j$ ) has on  $R_0$ . In order to focus on the effect of  $\sigma_j$ , we assume that the vector species differ only in  $\sigma_j$ . Also, to ensure that there is no advantage to choosing cattle over sheep (or vice versa), we set  $r_C = r_S$ ,  $d_C = d_S$  and  $m_{C1} = m_{S1} = m_{C2} = m_{S2}$ . When  $\sigma_j = 0$ , the proportion of vectors of type  $j$  attracted to cattle ( $\phi_j$ ) equals 1. When  $\sigma_j = 1$  (i.e. no preference),  $\phi_j$  just depends on the relative numbers of each host species, with a greater number resulting in a greater share of the vectors. As  $\sigma_j \rightarrow \infty$ ,  $\phi_j \rightarrow 0$  where all vectors are attracted to sheep. To prevent loss of detail as  $\sigma_j \rightarrow \infty$ , in Figure 3 we use  $\alpha_j$  rather than  $\sigma_j$ , where  $\alpha_j$  is an alternative measure of vector host preference such that  $\sigma_j = \alpha_j / (1 - \alpha_j)$ . From this formula we can see that as  $\alpha_j$  varies from 0 to 1,  $\sigma_j$  varies from 0 to  $\infty$  and that  $\alpha_j = 0.5$  indicates no preference.

Figure 3 clearly shows that the minimum value of  $R_0$  lies on a straight line running from  $(\alpha_1 = 0, \alpha_2 = 1)$ , where  $\phi_1 = 1$  and  $\phi_2 = 0$  (i.e. vector type 1 feeds exclusively on cattle while vector type 2 feeds exclusively on sheep), through  $(\alpha_1 = 0.5, \alpha_2 = 0.5)$ , where  $\phi_1 = 0.5$  and  $\phi_2 = 0.5$  (i.e. neither vector has a preference and so both vector species are equally distributed between both host species), to  $(\alpha_1 = 1, \alpha_2 = 0)$ , where  $\phi_1 = 0$  and  $\phi_2 = 1$  (i.e. vector 1 feeds exclusively on sheep while vector 2 feeds exclusively on

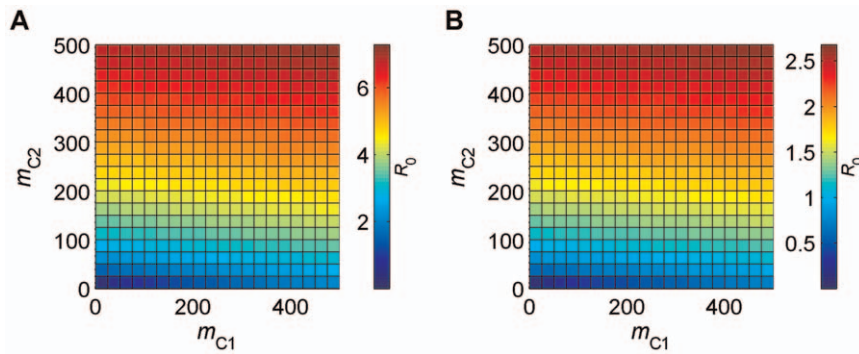

**Figure 1. Effect on  $R_0$  of differences in the vector to host ratios  $m_{C1}$  and  $m_{C2}$ .** In (A) the temperature is 25°C, while in (B) it is 15°C. Parameter values (1 = *C. imicola*, 2 = *C. bolitinos*):  $b_1 = 0.9$ ,  $b_2 = 0.9$ ,  $\sigma_1 = 0.5$ ,  $\sigma_2 = 0.5$ ,  $r_C = 1/20.6$ ,  $r_S = 1/16.4$ ,  $d_C = 0$ ,  $d_S = 0.005$ ,  $m_{S1} = m_{C1}$ ,  $m_{S2} = m_{C2}$ ,  $\beta_1$ ,  $\beta_2$ ,  $a_1$ ,  $a_2$ ,  $\mu_1$ ,  $\mu_2$ ,  $\nu_1$  and  $\nu_2$  are determined by temperature. doi:10.1371/journal.pone.0053128.g001

cattle). Any deviation from this line results in a higher  $R_0$ . This figure clearly shows two things: firstly, that different combinations of vector host preferences can result in the same  $R_0$ ; second, that when both vectors prefer the same host species,  $R_0$  is greater. This result is important because it shows that, when the vector species differ only in host preference and the host species are equally good as hosts (in this case, they share the same infectious period and the same pathogen-induced mortality rate) and equally abundant, overlooking vector host preference can result in an underestimation of  $R_0$ .

In Figures 1 and 2 and Table 3, we used  $\sigma_1 = \sigma_2 = 0.5$  (which corresponds to  $\alpha_1 = \alpha_2 = 1/3$ ) as many *Culicoides* species prefer to feed on cattle [14,16]. However, while it is clear that *C. imicola* also feeds on sheep (and even horses and pigs too), there is some evidence that *C. bolitinos* does not – instead feeding exclusively on cattle and horses [16,17]. A strong association between *C. bolitinos* and cattle is further suggested by the fact that *C. bolitinos* breeds in cattle dung [14], rather than soil like *C. imicola*. In terms of  $R_0$ , if *C. bolitinos* does not feed on sheep, then  $\sigma_2 = 0$  (i.e.  $\alpha_2 = 0$ ) and the true value of  $R_0$  will be higher than our estimates based on  $\sigma_2 = 0.5$ .

### $R_0$ approximations

The need for the two-host, two-vector formula is further emphasised when we consider several approximations based on

the two-host, one-vector formula for  $R_0$ , which is

$$R_0 = \sqrt{\left(\frac{b\beta a^2}{\mu}\right) \left(\frac{\nu}{\nu + \mu}\right) \left(\frac{\phi^2 m_C}{r_C + d_C} + \frac{(1-\phi)^2 m_S}{r_S + d_S}\right)}. \quad (4)$$

Suppose we have information on two vectors that are circulating in the same area and feeding on the same host populations. We might think it reasonable to assume that the vectors are acting independently, merely feeding on the same hosts. In which case, one option would be to calculate  $R_0$  for each vector separately and add them together. We refer to this approximation as  $R_{0, \text{sum}}$  (i.e.  $R_{0, \text{sum}} = \sqrt{R_{11}} + \sqrt{R_{22}}$ ). It incorporates the idea that there is no cross-infection. Table 3 contains the true value of  $R_0$  (i.e. calculated using the two host, two vector formula) and the value of  $R_{0, \text{sum}}$  under different scenarios. In examples a and b the temperature is 25°C and *C. imicola* is 10 times more abundant than *C. bolitinos* (representing warmer low-lying areas), whereas in examples c and d the temperature is 15°C and *C. bolitinos* is 10 times more abundant than *C. imicola* (representing cooler high-lying areas). In a and c, the vectors are assumed to have the same preference for cattle (i.e.  $\sigma_1 = \sigma_2 = 0.5$ ) so  $\phi_1 = \phi_2$ . In b and d, *C. imicola* is assumed to have no preference for a particular host, while *C. bolitinos* is assumed to feed exclusively on cattle (i.e.  $\sigma_1 = 1$ ,

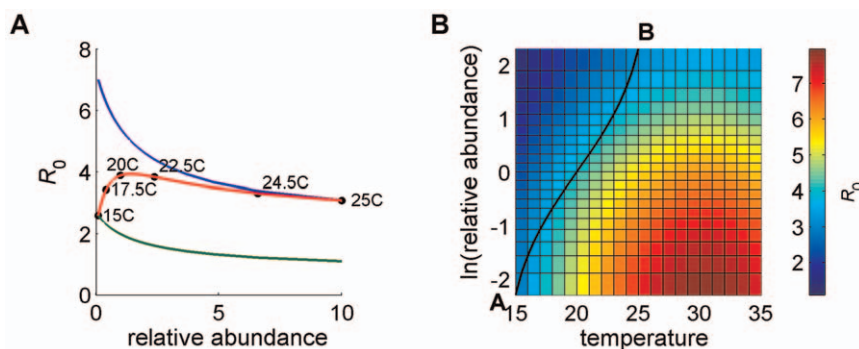

**Figure 2. Effect on  $R_0$  of relative abundance and temperature.** In (A)  $R_0$  is plotted against relative abundance ( $m_{C1}/m_{C2} = N_1/N_2$ ), which varies from 0.1 (when *C. bolitinos* is 10 times more abundant than *C. imicola*) to 10 (when *C. imicola* is 10 times more abundant than *C. bolitinos*). Temperature is either fixed at 25°C or 15°C or varies from 15°C to 25°C as relative abundance varies from 0.1 to 10. In (B)  $R_0$  is plotted against  $\ln(\text{relative abundance})$  and temperature. Parameter values (1 = *C. imicola*, 2 = *C. bolitinos*):  $b_1 = 0.9$ ,  $b_2 = 0.9$ ,  $\sigma_1 = 0.5$ ,  $\sigma_2 = 0.5$ ,  $r_C = 1/20.6$ ,  $r_S = 1/16.4$ ,  $d_C = 0$ ,  $d_S = 0.005$ ,  $m_{S1} = m_{C1}$ ,  $m_{S2} = m_{C2}$ ,  $a_1$ ,  $a_2$ ,  $\mu_1$ ,  $\mu_2$ ,  $\nu_1$ ,  $\nu_2$ ,  $\beta_1$  and  $\beta_2$  are determined by temperature. doi:10.1371/journal.pone.0053128.g002

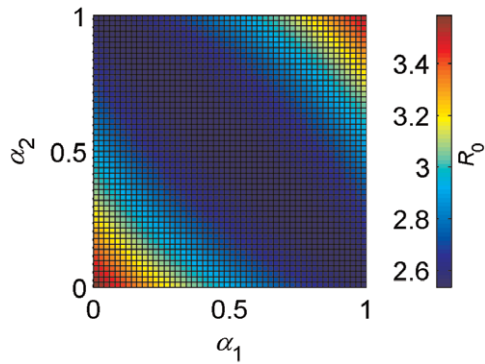

**Figure 3. Effect on  $R_0$  of differences in the vector host preferences  $\alpha_1$  and  $\alpha_2$ .** Parameter values (1 = *C. imicola*, 2 = *C. bolitinos*):  $b_1 = b_2 = 0.9$ ,  $m_{C1} = m_{C2} = m_{S1} = m_{S2} = 500$ ,  $r_C = r_S = 1/16.4$ ,  $d_C = d_S = 0.005$ ,  $a_1, a_2, \mu_1, \mu_2, \nu_1, \nu_2$  and  $\beta_1$  are determined by temperature  $T$ , where  $T = 25^\circ\text{C}$ ,  $\beta_2 = \beta_1$ . doi:10.1371/journal.pone.0053128.g003

$\sigma_2 = 0$ ) so  $\phi_1 < \phi_2$ . In these examples,  $R_{0,\text{sum}}$  consistently overestimates  $R_0$  by between 5% and 45%.

An alternative approach would be to pool the vectors (e.g.  $m_C = m_{C1} + m_{C2}$  and  $m_S = m_{S1} + m_{S2}$ ) and use average values (e.g.  $\beta = (\beta_1 + \beta_2)/2$  and  $\phi = (\phi_1 + \phi_2)/2$ ). In the examples in Table 3, we have assumed that the vectors are very similar and so share many parameter values. In fact, we have assumed that they differ only in vector to host ratio ( $m_{ij}$ ), host to vector transmission probability ( $\beta_j$ ) and vector host preference ( $\sigma_j$ ). So,  $R_{0,\text{ave}}$  can be obtained by substituting  $m_C$ ,  $m_S$ ,  $\beta$  and  $\phi$  into equation (4). Surprisingly, the examples reveal that  $R_{0,\text{ave}}$  can sometimes overestimate and sometimes underestimate the true value by a significant amount.

Another possible approximation is obtained by first calculating the lower and upper bounds given by  $R_{0,\text{min}\beta}$  and  $R_{0,\text{max}\beta}$  and then taking the weighted average ( $R_{0,\text{wtsum}}$ ).  $R_{0,\text{min}\beta}$  is calculated in the same way as  $R_{0,\text{ave}}$  except that the host to vector transmission probability ( $\beta$ ) takes the minimum value ( $\beta_1$ , where  $\beta_1 < \beta_2$ ), rather than the average, and the proportion of vectors attracted to cattle ( $\phi$ ) takes the minimum value ( $\phi_1$ , where  $\phi_1 < \phi_2$ ), rather than the

average.  $R_{0,\text{max}\beta}$  is the equivalent calculation using the maximum host to vector transmission probability (in this case  $\beta_2$ ) and the maximum proportion of vectors attracted to cattle (in this case  $\phi_2$ ).  $R_{0,\text{wtsum}}$  is then the weighted sum of  $R_{0,\text{min}\beta}$  and  $R_{0,\text{max}\beta}$  (i.e.  $[m_1/(m_1 + m_2)]R_{0,\text{min}\beta} + [m_2/(m_1 + m_2)]R_{0,\text{max}\beta}$ , where  $m_1 = m_{C1} + m_{S1}$  and  $m_2 = m_{C2} + m_{S2}$ ). We can see from Table 3 that  $R_{0,\text{wtsum}}$  can provide a fairly good approximation to  $R_0$ . In our examples, it consistently underestimates  $R_0$ , but never by more than 19% and sometimes by as little as 2%. Alternative formulations in terms of  $R_{11}$  and  $R_{22}$  are given in Table 3 for comparison with  $R_{0,\text{sum}}$ . Note however that, for  $R_{0,\text{ave}}$ ,  $R_{0,\text{min}\beta}$ ,  $R_{0,\text{max}\beta}$  and  $R_{0,\text{wtsum}}$ , the formula given is for  $\phi_1 = \phi_2$  only. There is insufficient space to give the more general expression.

These examples suggest that, even when the vectors are very similar and share many parameter values, simply summing the contribution from each vector species ( $R_{0,\text{sum}}$ ) will lead to overestimation of  $R_0$  and that the degree of overestimation can be large.  $R_{0,\text{wtsum}}$  appears to provide a more consistent estimate. Table 3 also shows that intuitive approximations like  $R_{0,\text{ave}}$  can be very misleading, sometimes underestimating and sometimes overestimating the true value of  $R_0$ .

### Discussion

We have presented an expression for  $R_0$  for a two-host, two-vector system and demonstrated its sensitivity to parameters relating to vector abundance, vector competence and vector host preference. We have shown that high vector competence can offset low vector abundance and that, where high vector competence and high vector abundance coincide,  $R_0$  can reach high values. We have also shown that the highest value of  $R_0$  does not always coincide with the highest  $\beta_j$  values. Earlier work using a one-host, one-vector formulation showed that when  $a$ ,  $\mu$  and  $\nu$  vary with temperature,  $R_0$  at first increases with temperature then decreases [22]. We observed the same behaviour when using the slightly different temperature-dependent functions described in Table 1. Figure 2B shows that this relationship is maintained when  $\beta_1$  and  $\beta_2$  also increase with temperature.

As shown in Figure 3, vector host preference has an interesting effect on  $R_0$ . When the vector species differ only in host preference and the host species are equally good as hosts and equally

**Table 3. 2-host, 2-vector  $R_0$  and possible approximations based on the 2-host, 1-vector formula.**

| Symbol                  | Description                                                         | †Formula in terms of $R_{11}$ and $R_{22}$                                                                                                                                        | $T = 25^\circ\text{C}$ |                   | $T = 15^\circ\text{C}$ |                   |
|-------------------------|---------------------------------------------------------------------|-----------------------------------------------------------------------------------------------------------------------------------------------------------------------------------|------------------------|-------------------|------------------------|-------------------|
|                         |                                                                     |                                                                                                                                                                                   | a                      | b                 | c                      | d                 |
| $R_0$                   |                                                                     | Equation (1)                                                                                                                                                                      | $\phi_1 = \phi_2$      | $\phi_1 < \phi_2$ | $\phi_1 = \phi_2^s$    | $\phi_1 < \phi_2$ |
| $R_{0,\text{sum}}$      | No cross-infection                                                  | $\sqrt{R_{11}} + \sqrt{R_{22}}$                                                                                                                                                   | 4.3464                 | 4.9829            | 2.8098                 | 3.7631            |
| $R_{0,\text{min}\beta}$ | Total $m$ with min $\beta$ and $\phi$                               | $\sqrt{R_{11} + (\beta_1/\beta_2)R_{22}}$                                                                                                                                         | 2.2492                 | 2.0425            | 0.7776                 | 0.7061            |
| $R_{0,\text{wtsum}}$    | Weighted sum of $R_{0,\text{min}\beta}$ and $R_{0,\text{max}\beta}$ | $\left(\frac{\sqrt{\beta_1(m_{C1} + m_{S1})} + \sqrt{\beta_2(m_{C2} + m_{S2})}}{m_{C1} + m_{S1} + m_{C2} + m_{S2}}\right) \sqrt{\frac{R_{11}}{\beta_1} + \frac{R_{22}}{\beta_2}}$ | 2.7086                 | 2.7721            | 2.5261                 | 3.4492            |
| $R_{0,\text{ave}}$      | Total $m$ with mean $\beta$ and $\phi$                              | $\sqrt{\left(\frac{\beta_1 + \beta_2}{2}\right) \left(\frac{R_{11}}{\beta_1} + \frac{R_{22}}{\beta_2}\right)}$                                                                    | 5.4032                 | 5.8104            | 1.9875                 | 2.1372            |
| $R_{0,\text{max}\beta}$ | Total $m$ with max $\beta$ and $\phi$                               | $\sqrt{(\beta_2/\beta_1)R_{11} + R_{22}}$                                                                                                                                         | 7.3028                 | 10.0674           | 2.7010                 | 3.7235            |

Parameter values (1 = *C. imicola*, 2 = *C. bolitinos*):  $b_1 = 0.9$ ,  $b_2 = 0.9$ ,  $r_C = 1/20.6$ ,  $r_S = 1/16.4$ ,  $d_C = 0$ ,  $d_S = 0.005$ ,  $m_{S1} = m_{C1}$ ,  $m_{S2} = m_{C2}$ ,  $\beta_1, \beta_2, a_1, a_2, \mu_1, \mu_2, \nu_1$  and  $\nu_2$  are determined by temperature, (a)  $m_{C1} = 500$ ,  $m_{C2} = 50$ ,  $T = 25^\circ\text{C}$ ,  $\sigma_1 = 0.5$  and  $\sigma_2 = 0.5$ , (b)  $m_{C1} = 500$ ,  $m_{C2} = 50$ ,  $T = 25^\circ\text{C}$ ,  $\sigma_1 = 1$  and  $\sigma_2 = 0$ , (c)  $m_{C1} = 50$ ,  $m_{C2} = 500$ ,  $T = 15^\circ\text{C}$ ,  $\sigma_1 = 0.5$  and  $\sigma_2 = 0.5$ , (d)  $m_{C1} = 50$ ,  $m_{C2} = 500$ ,  $T = 15^\circ\text{C}$ ,  $\sigma_1 = 1$  and  $\sigma_2 = 0$ .

†For the approximations  $R_{0,\text{min}\beta}$ ,  $R_{0,\text{wtsum}}$ ,  $R_{0,\text{ave}}$  and  $R_{0,\text{max}\beta}$ , the formula given is for  $\phi_1 = \phi_2$  only. There is insufficient space to give the more general expressions. doi:10.1371/journal.pone.0053128.t003

abundant, a preference for one host species can increase  $R_0$  if the total feeding rate is maintained. When *both* vectors prefer the same host species,  $R_0$  will increase. When the preferred host benefits transmission (e.g. by having a longer infectious period, like cattle with bluetongue), then  $R_0$  will increase further. However, if the preferred host is less beneficial or more abundant, then  $R_0$  will decrease.

In this model, the vector species do not directly interact. They merely feed upon the same pool of susceptible hosts. So, we might expect a simpler formulation expressed in terms of the two-host, one-vector  $R_0$  for each species to provide a good approximation to  $R_0$ . We considered several possibilities and found that simply summing the contribution from each vector species ( $R_{0,\text{sum}}$ ) leads to overestimation of  $R_0$ , while using average values ( $R_{0,\text{ave}}$ ) can lead to under or overestimation. A more consistent estimate was provided by  $R_{0,\text{wsum}}$ . However, this approximation relies on the fact that the vectors differ in  $m_{ij}$ ,  $\beta_j$  and  $\sigma_j$  only. When the vectors differ in many ways, we can see from equation (1) that the two-host, one-vector formula will provide a good approximation when the level of cross-infection between vector species is very small. As this approaches the level of intraspecific infection, a combination of the two-host, one-vector  $R_0$  for each vector species (i.e.  $\sqrt{R_{11} + R_{22}}$ ) becomes a better estimate. Otherwise, particularly

when the level of cross-infection is high, the two-host, two-vector formula is required for accurate estimation of  $R_0$ .

The results of this work demonstrate the need for a two-host, two-vector formula for  $R_0$  in areas that support two significant vectors, particularly where those vectors differ in many ways. Further extensions of this model would be required for areas where there were more than two important vectors. Northern Europe could be one such area. Both *C. pulicaris* and *C. obsoletus* transmit bluetongue in this region. However, both of these vectors are in fact vector species groups containing multiple vector species (e.g. the *C. obsoletus* group contains four distinct vector species). At the moment, there is insufficient information about differences in vector competence between these species to be able to use this  $R_0$  formula (or an extension of it) in this region.

## Supporting Information

**File S1 Supporting information.**  
(DOC)

## Author Contributions

Conceived and designed the experiments: JT RGB MB. Performed the experiments: JT. Analyzed the data: JT RGB MB. Wrote the paper: JT RGB MB.

## References

1. Diekmann O, Heesterbeek JAP, Roberts MG (2010) The construction of next-generation matrices for compartmental epidemic models. *J R Soc Interface* 7: 873–885.
2. Macdonald G (1955) The measurement of malaria transmission. *Proc R Soc Med* 48: 295–302.
3. Rogers DJ (1988) A general model for the African trypanosomiasis. *Parasitol* 97: 193–212.
4. Lord CC, Woolhouse MEJ, Heesterbeek JAP, Mellor PS (1996) Vector-borne diseases and the basic reproduction number: a case study of African horse sickness. *Med Vet Entomol* 10: 19–28.
5. Hartemink NA, Purse BV, Meiswinkel R, Brown HE, de Koeijer A, et al. (2009) Mapping the basic reproduction number ( $R_0$ ) for vector-borne diseases: A case study on bluetongue virus. *Epidemics* 1: 153–161.
6. Gubbins S, Carpenter S, Baylis M, Wood JLN, Mellor PS (2008) Assessing the risk of bluetongue to UK livestock: uncertainty and sensitivity analyses of a temperature-dependent model for the basic reproduction number. *J R Soc Interface* 5: 363–371.
7. Lopez LF, Coutinho FAB, Burattini MN, Massad E (2002) Threshold conditions for infection persistence in complex host-vectors interactions. *C R Biologies* 325: 1073–1084.
8. Pessanha JEM, Caiaffa WT, Cecilio AB, Iani FC de M, Araujo SC, et al. (2011) Cocirculation of two dengue virus serotypes in individual and pooled samples of *Aedes aegypti* and *Aedes albopictus* larvae. *Rev Soc Bras Med Trop* 44: 103–105.
9. Suryanarayana Murthy U, Srinivasa Rao M, Arunachalam N (2010) The effects of climatic factors on the distribution and abundance of Japanese encephalitis vectors in Kurnool district of Andhra Pradesh, India. *J Vector Borne Dis* 47: 26–32.
10. Tanga MC, Ngundu WI, Tchouassi PD (2011) Daily survival and human blood index of major malaria vectors associated with oil palm cultivation in Cameroon and their role in malaria transmission. *Trop Med Int Health* 16: 447–457.
11. Purse BV, Mellor PS, Rogers DJ, Samuel AR, Mertens PPC, et al. (2005) Climate change and the recent emergence of bluetongue in Europe. *Nat Rev Microbiol* 3: 171–181.
12. Torina A, Caracappa S, Mellor PS, Baylis M, Purse BV (2004) Spatial distribution of bluetongue virus and its *Culicoides* vectors in Sicily. *Med Vet Entomol* 18: 81–89.
13. Meiswinkel R, Labuschagne K, Baylis M, Mellor PS (2004) Multiple vectors and their differing ecologies: observations on two bluetongue and African horse sickness vector *Culicoides* species in South Africa. *Vet Ital* 40: 296–302.
14. Venter GJ, Meiswinkel R (1994) The virtual absence of *Culicoides imicola* (Diptera: Ceratopogonidae) in a light-trap survey of the colder, high-lying area of the eastern Orange Free State, South Africa, and implications for the transmission of arboviruses. *Onderstepoort J Vet* 61: 327–340.
15. Paweska JT, Venter GJ, Mellor PS (2002) Vector competence of South African *Culicoides* species for bluetongue virus serotype 1 (BTV-1) with special reference to the effect of temperature on the rate of virus replication in *C. imicola* and *C. bolitinos*. *Med Vet Entomol* 16: 10–21.
16. Venter GJ, Meiswinkel R, Nevill EM, Edwards M (1996) *Culicoides* (Diptera: Ceratopogonidae) associated with livestock in the Onderstepoort area, Gauteng, South Africa as determined by light-trap collections. *Onderstepoort J Vet* 63: 315–325.
17. Venter GJ, Nevill EM, van der Linde TC de K (1996) Geographical distribution and relative abundance of stock-associated *Culicoides* (Diptera: Ceratopogonidae) in southern Africa in relation to their potential as viral vectors. *Onderstepoort J Vet* 63: 25–38.
18. Garros C, Gardes L, Allene X, Rakotoarivony I, Viennet E, et al. (2011) Adaptation of a species-specific multiplex PCR assay for the identification of blood meal source in *Culicoides* (Ceratopogonidae: Diptera): applications on Palaearctic biting midge species, vectors of Orbiviruses. *Infection, Genetics and Evolution* 11: 1103–1110.
19. Venter GJ, Paweska JT, van Dijk AA, Mellor PS, Tabachnick WJ (1998) Vector competence of *Culicoides bolitinos* and *C. imicola* (Diptera: Ceratopogonidae) for South African bluetongue virus serotypes 1, 3 and 4. *Med Vet Entomol* 12: 101–108.
20. Fu H, Leake CJ, Mertens PPC, Mellor PS (1999) The barriers to bluetongue virus infection, dissemination and transmission in the vector, *Culicoides variipennis* (Diptera: Ceratopogonidae). *Arch Virol* 144: 747–761.
21. Guis H, Caminade C, Calvete C, Morse AP, Tran A, et al. (2011) Modelling the effects of past and future climate on the risk of bluetongue emergence in Europe. *J R Soc Interface*. DOI: 10.1098/rsif.2011.0255.
22. de Koeijer AA, Elbers ARW (2007) Modelling of vector-borne diseases and transmission of bluetongue virus in North-West Europe. In: Takken W, Knols BGJ, editors. *Emerging pests and vector-borne diseases in Europe - Ecology and control of vector-borne diseases vol. 1*. The Netherlands: Wageningen Academic Publishers. pp. 99–112.
23. Nevill EM (1978) The use of cattle to protect sheep from bluetongue infection. *J S Afr Vet Assoc* 49: 129–130.
